# Supplementary material for: Treatment of intermittent hypoxia increases phosphorylated tau in the hippocampus via biological processes common to aging
Source: PubMed Central journal article supplement (PMC5217192; doi:10.1186/s13041-016-0282-7), 2017-01-05
Supplement: 13041_2016_282_MOESM1_ESM.pdf [file 13041_2016_282_MOESM1_ESM.pdf]

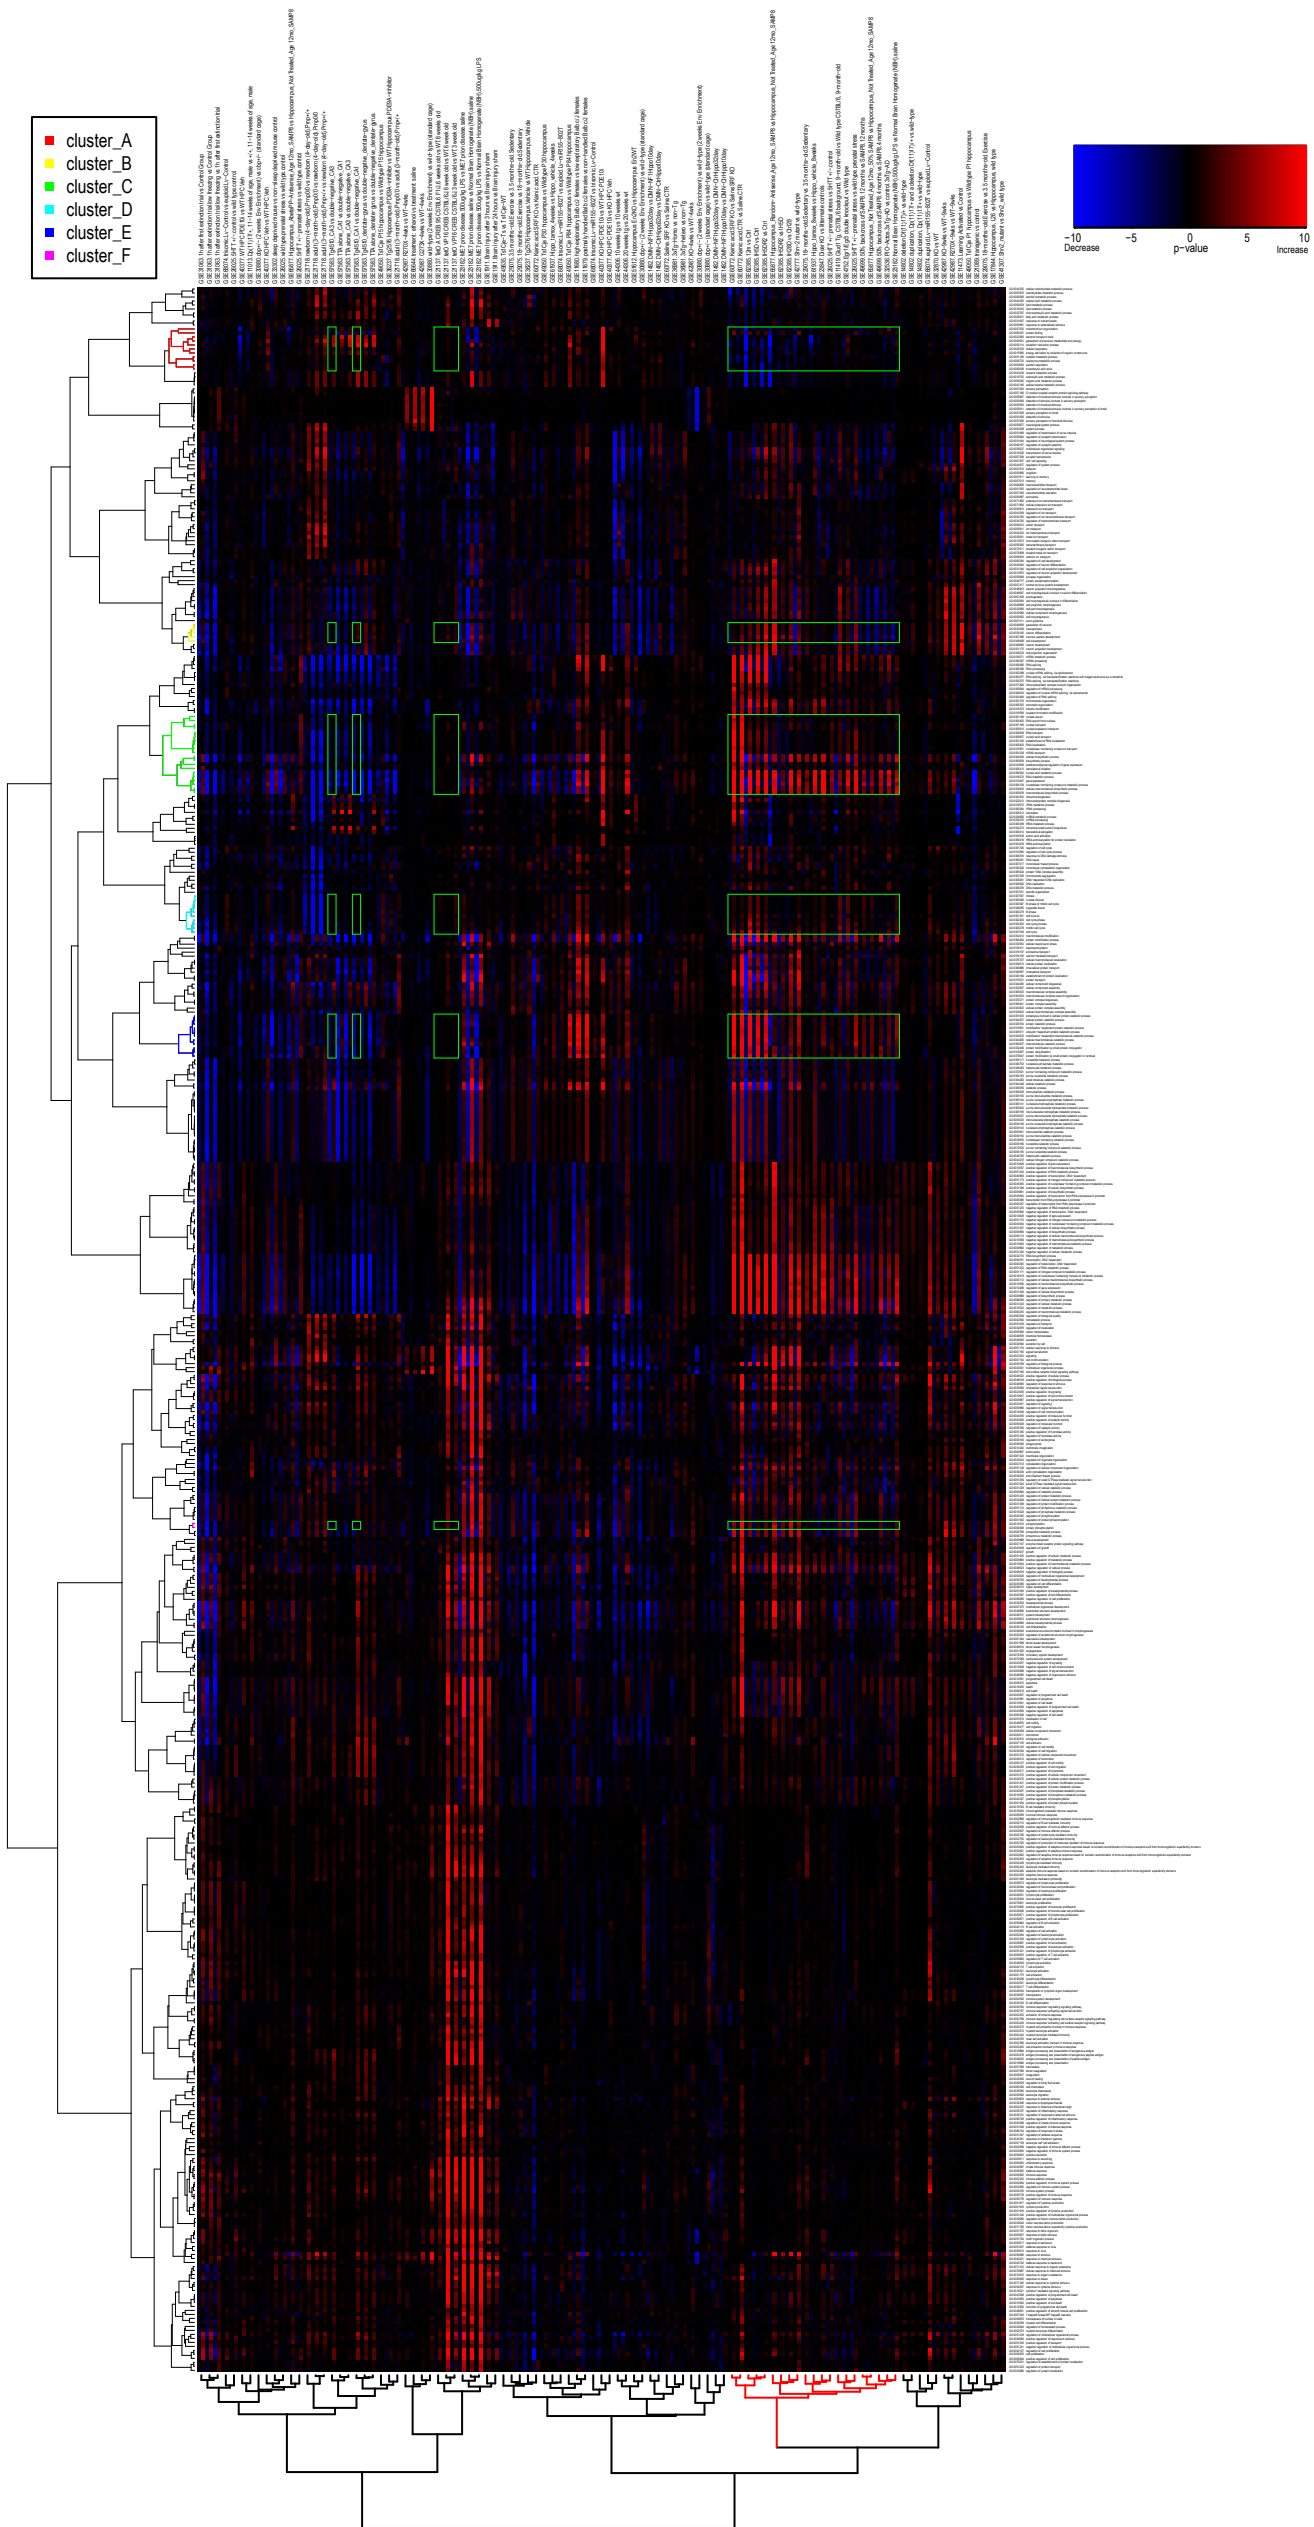

Figure S1

# MAPK signaling pathway (map04010)

IH5D

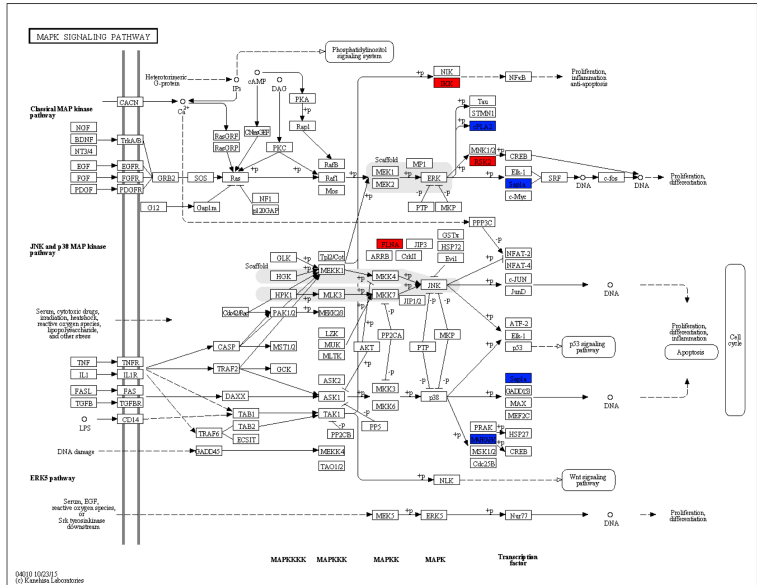

IH28D

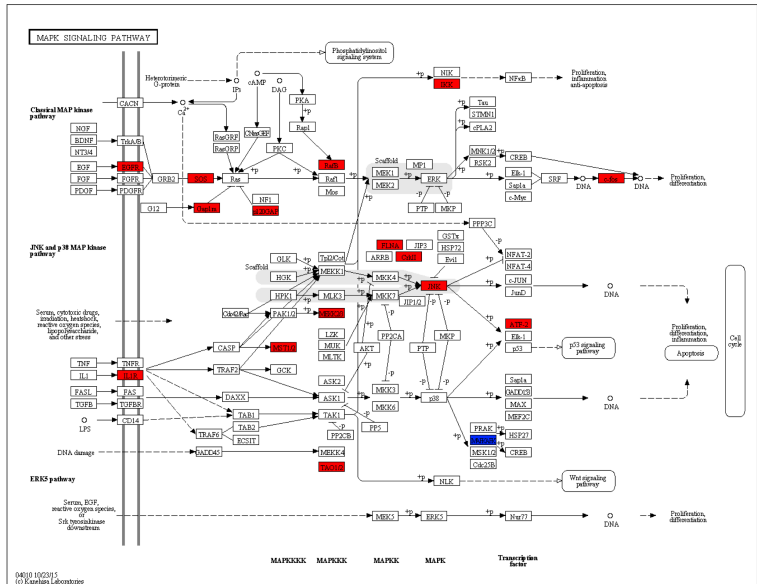

12m

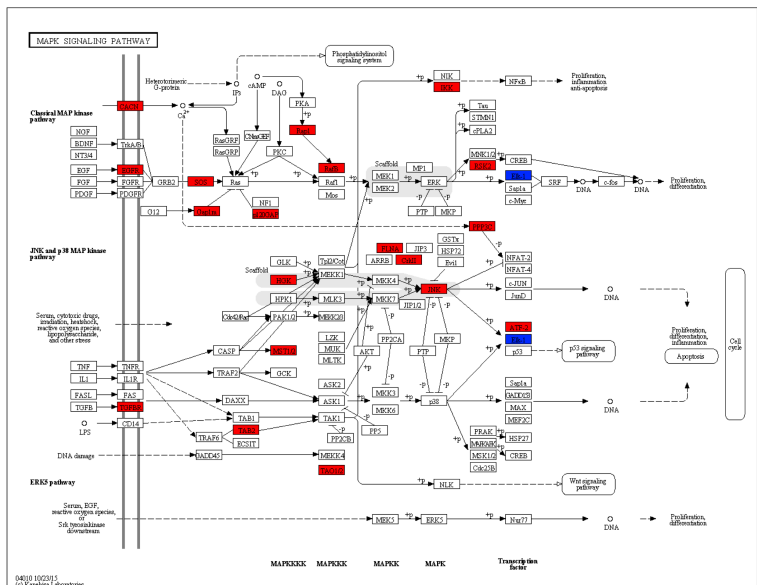

Figure S2

# PI3K-Akt signaling pathway (map04151)

IH5D

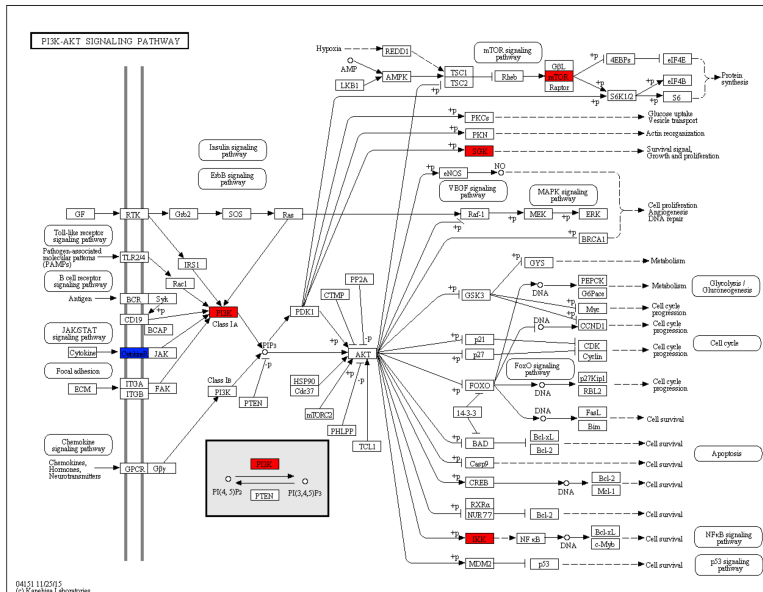

IH28D

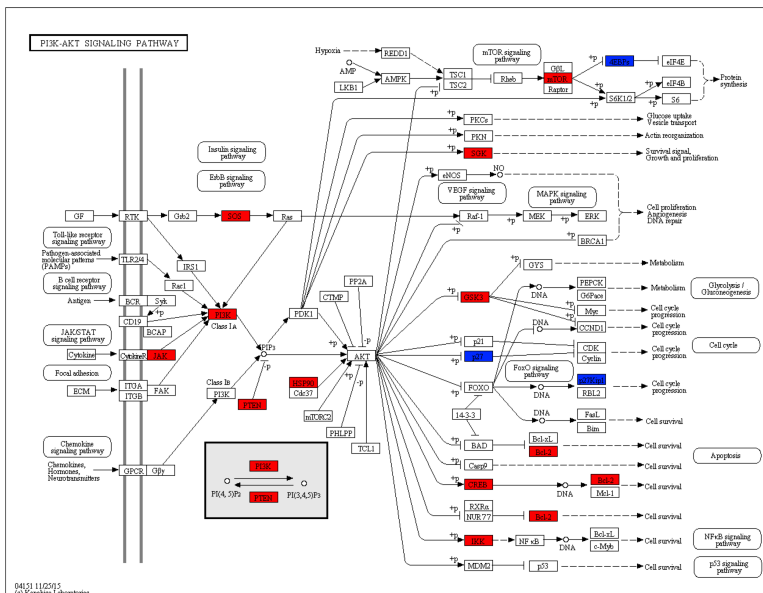

12m

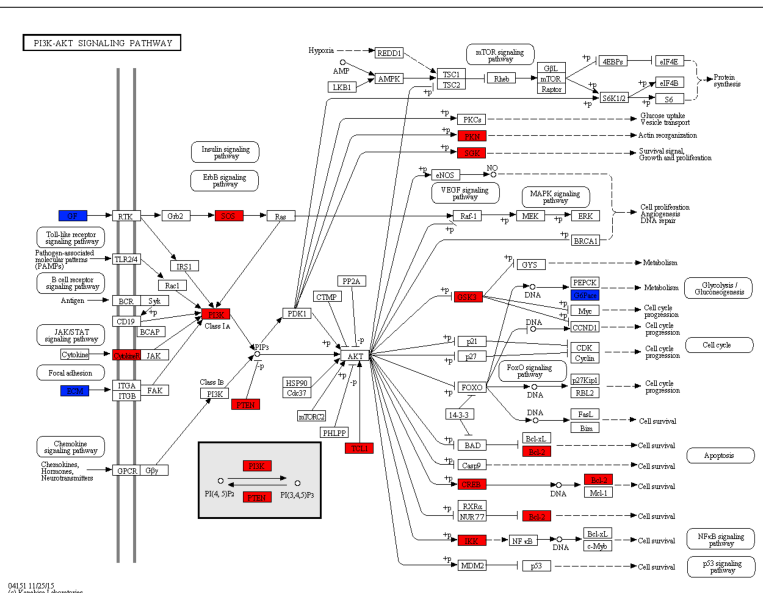

Figure S3

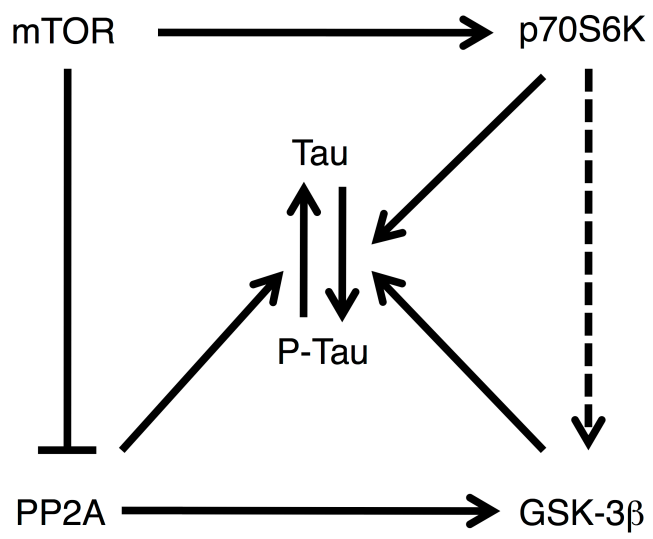

Figure S4



# Glutamatergic Synapse (map04724)

IH5D

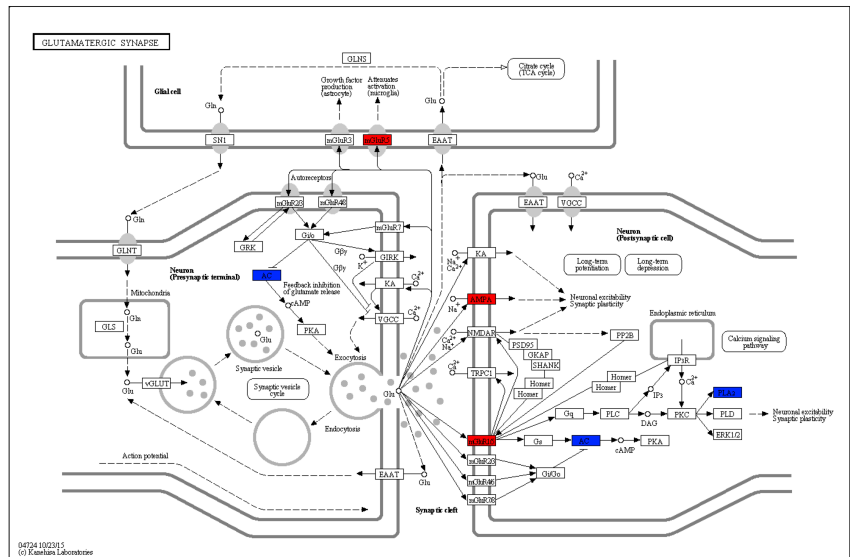

IH28D

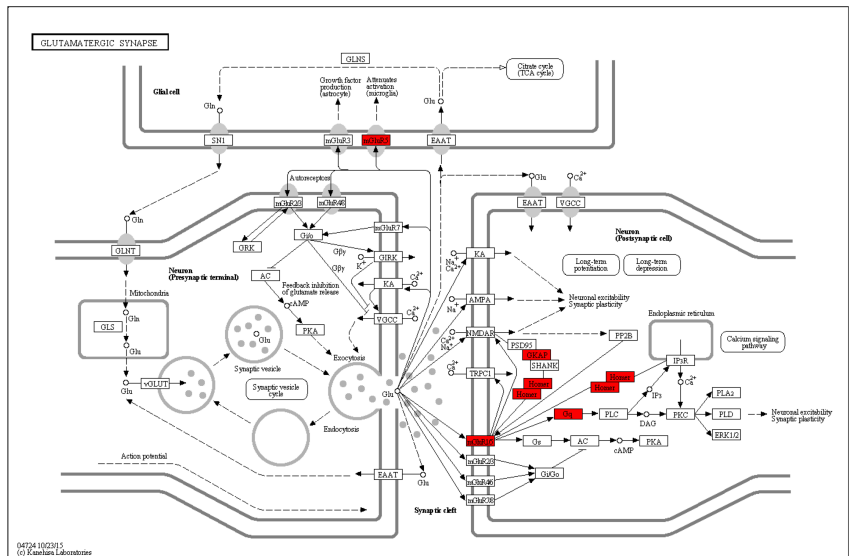

12m

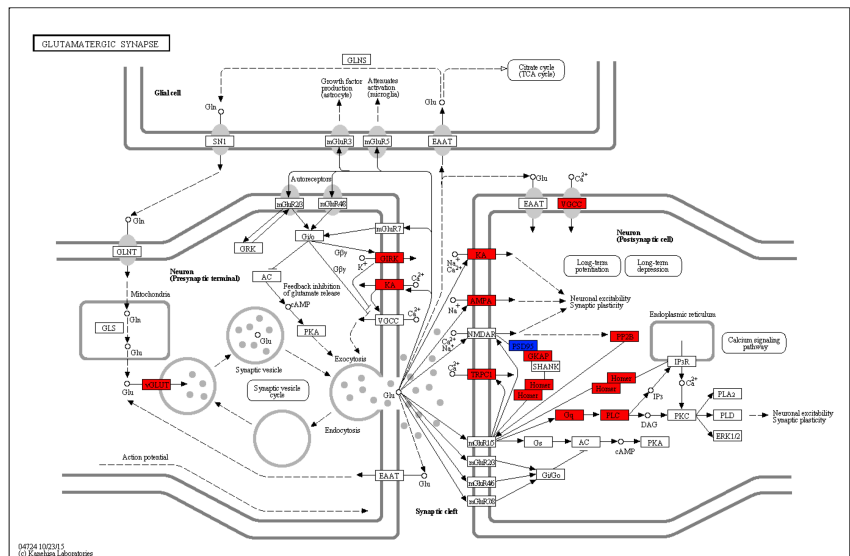

Figure S5
